# Supplementary material for: Mercaptoalbumin Is Associated with Graft Patency in Patients Undergoing Coronary Artery Bypass Grafting
Source: MDPI journal article supplement (doi:10.3390/antiox11040702), 2022-04-02
Supplement: s1 [file s1]

**Table S1.** Results from NRI analysis. Simple-model included D-Dimer, logistic euroscore and ECC time. Added model included also HSA-SH. NRI is the algebraic sum of the percent of events and non-events correctly reclassified minus those wrongly reclassified

| Events       |          |           |           |           |
|--------------|----------|-----------|-----------|-----------|
| Added model  |          |           |           |           |
| Simple model | <33%     | 33-66%    | >66%      | Total     |
| <33%         | 3 (8.8)  | 2 (5.9)   | 0 (0)     | 5 (14.7)  |
| 33-66%       | 1 (2.9)  | 10 (29.4) | 4 (11.8)  | 15 (44.1) |
| >66%         | 0 (0)    | 0 (0)     | 14 (41.2) | 14 (41.2) |
| Total        | 4 (11.8) | 12 (35.3) | 18 (52.9) | 34 (100)  |

  

| Non events   |           |           |         |           |
|--------------|-----------|-----------|---------|-----------|
| Added model  |           |           |         |           |
| Simple model | <33%      | 33-66%    | >66%    | Total     |
| <33%         | 16 (42.1) | 1 (2.6)   | 0 (0)   | 17 (44.7) |
| 33-66%       | 6 (15.8)  | 10 (26.3) | 1 (2.6) | 17 (44.7) |
| >66%         | 0 (0)     | 2 (5.3)   | 2 (5.3) | 4 (10.5)  |
| Total        | 22 (57.9) | 13 (34.2) | 3 (7.9) | 38 (100)  |

  

| Reclassified |           |          | Net   | NRI   |
|--------------|-----------|----------|-------|-------|
|              | higher    | lower    |       |       |
| Events       | 6 (17.6%) | 1 (2.9%) | 14.7% |       |
| non events   | 2 (5%)    | 8 (21%)  | 15.8% | 30.5% |
